# Supplementary material for: The Inflammatory Bowel Diseases and Ambient Air Pollution: A Novel Association
Source: PubMed Central journal article supplement — Am J Gastroenterol. 2010 Jun 29;105(11):2412–9. doi: 10.1038/ajg.2010.252 (PMC3180712; doi:10.1038/ajg.2010.252), 2010-06-29
Supplement: ajg2010252x1.pdf [file ajg2010252x1.pdf]

## APPENDIX

### Pollution concentrations in 2001 in the United Kingdom stratified by quintile group

| Quintile | NO <sub>2</sub> (µg/m <sup>3</sup> ) | PM <sub>10</sub> (µg/m <sup>3</sup> ) | SO <sub>2</sub> (µg/m <sup>3</sup> ) |
|----------|--------------------------------------|---------------------------------------|--------------------------------------|
| 1        | 4.4–16.4                             | 9.9–13.5                              | 0.7–2.4                              |
| 2        | 16.4–20.9                            | 13.5–14.6                             | 2.4–3.0                              |
| 3        | 20.9–26.2                            | 14.6–15.5                             | 3.0–3.8                              |
| 4        | 26.2–32.1                            | 15.5–16.8                             | 3.8–4.8                              |
| 5        | 32.1–59.7                            | 16.8–23.3                             | 4.8–25.1                             |
